# Supplementary material for: A review of fuel cell cathode catalysts based on hollow porous materials for improving oxygen reduction performance
Source: Royal Society of Chemistry journal article supplement (doi:10.1039/d4cy00830h), 2024-01-01
Supplement: d4cy00830h1.pdf [file d4cy00830h1.pdf]

## Supplementary material:

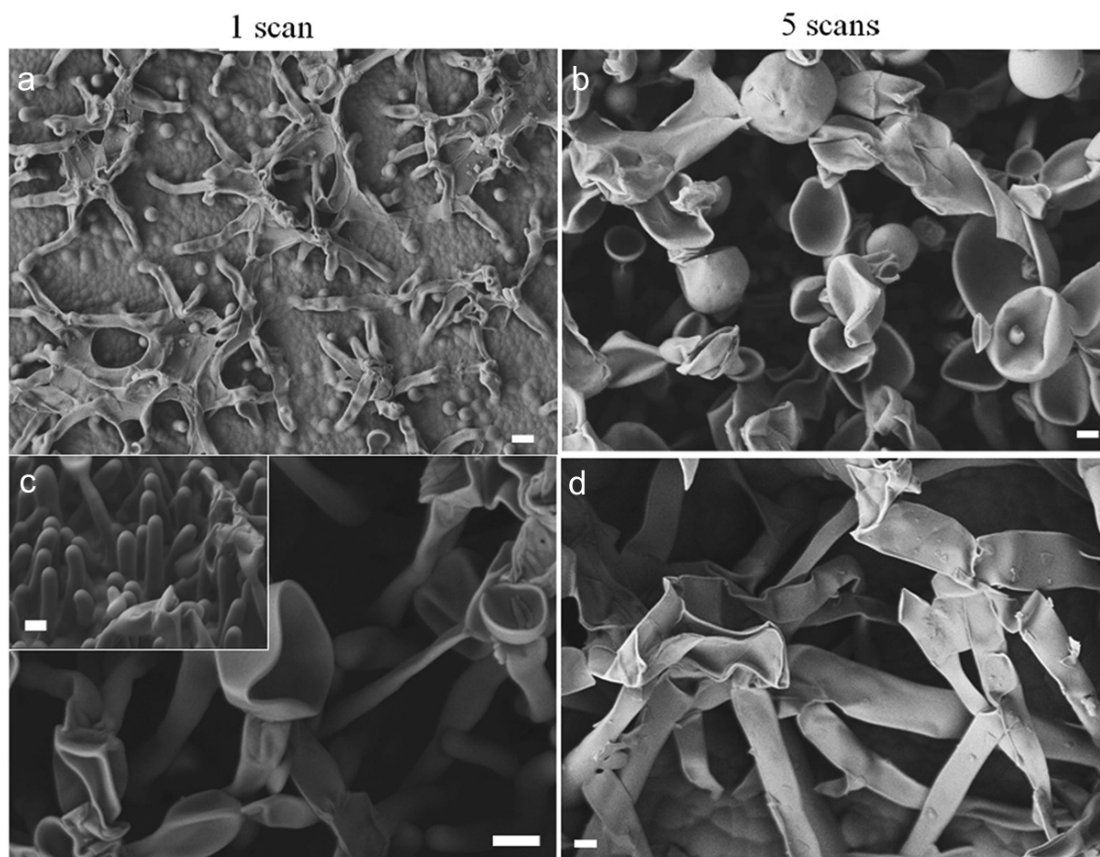

Figure S1<sup>1</sup>: a、 b)Pore structure of hydrophobic porous polymer films under different number of scans; c)Hole structures formed under cyclic voltammetry were used; d)Hole structure formed under constant current.

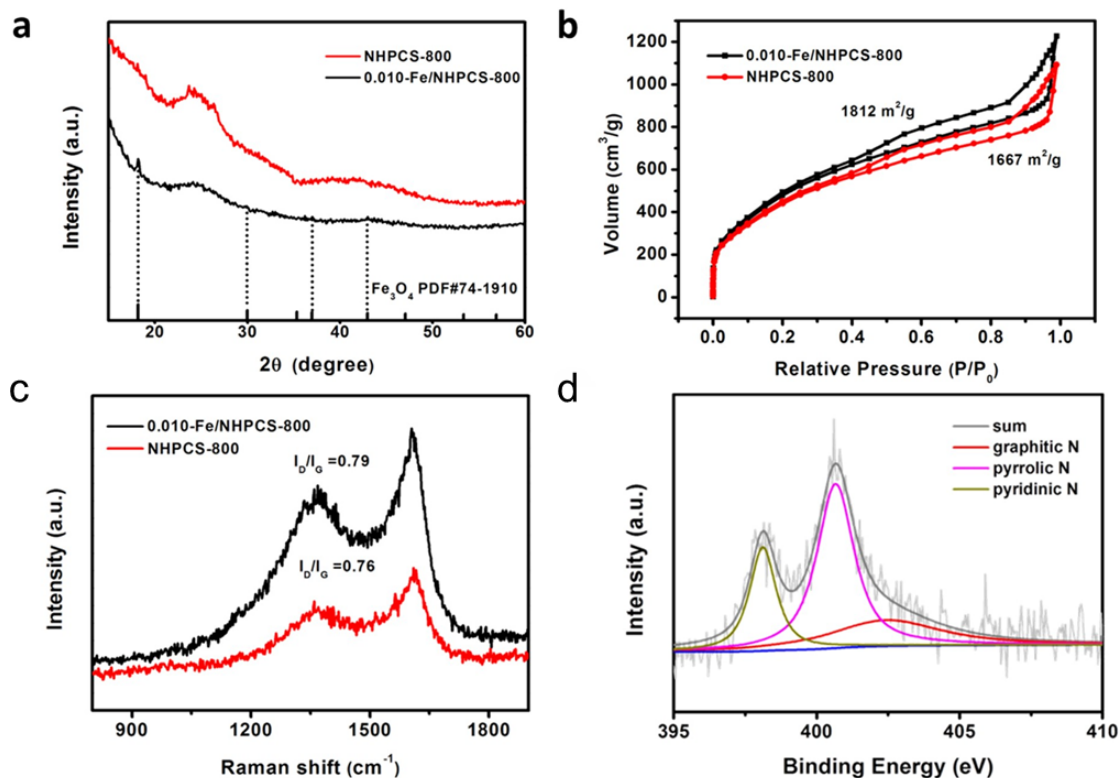

Figure S2<sup>2</sup>: a) The XRD patterns of 0.010-Fe/NHPCS-800 and NHPCS-800, b) the adsorption-desorption isotherms of 0.010-Fe/NHPCS-800 and NHPCS-800, c) the Raman plots of 0.010-Fe/NHPCS-800 and NHPCS-800, and d) the XPS spectra of the N 1s region of 0.010-Fe/NHPCS-800.

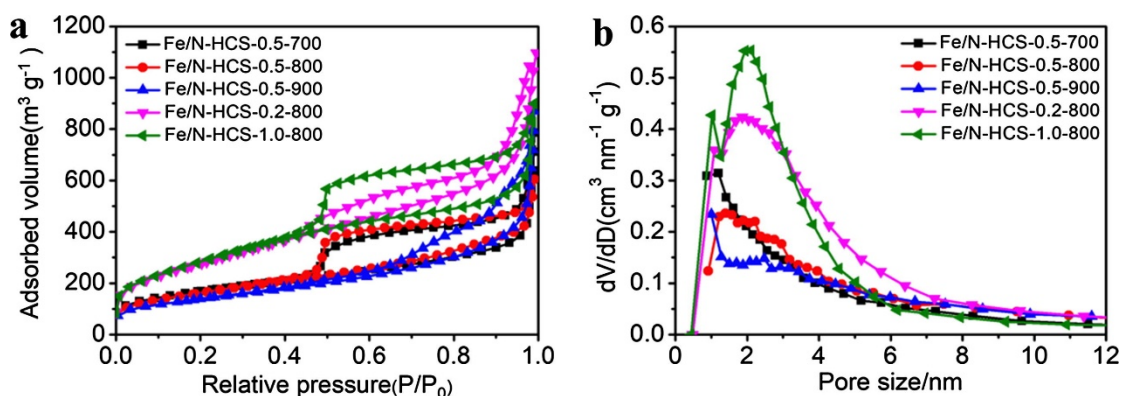

Figure S3<sup>3</sup>: a) Nitrogen adsorption-desorption isotherms and b) pore size distribution curve of Fe/N-HCS-X-T.

## Reference

- (1) Fradin, C.; Guittard, F.; Darmanin, T. A Soft Template Approach to Various Porous Nanostructures from Conjugated Carbazole-Based Monomers. *J. Of N.a. And N.a. Science* **2021**, *584*, 795–803. <https://doi.org/10.1016/j.jcis.2020.10.010>.
- (2) Wang, S.; Chen, L.; Liu, X.; Long, L.; Liu, H.; Liu, C.; Dong, S.; Jia, J. Fe/N-Doped Hollow Porous Carbon Spheres for Oxygen Reduction Reaction. *Nanotechnol.* **2020**, *31* (12), 125404. <https://doi.org/10.1088/1361-6528/ab5b56>.
- (3) Song, K.; Shi, B.; Song, D.; Zhang, Q.; He, X.; Dou, Z.; Hu, X.; Cui, L. Tunable Engineering Hollow Carbon Nanomaterial Served as an Excellent Catalyst for Oxygen Reduction Reaction and Hydrogen Evolution Reaction. *J. Of N.a. And N.a. Science* **2019**, *544*, 178–187. <https://doi.org/10.1016/j.jcis.2019.02.085>.
